# Supplementary material
Source: Springer Nature journal article supplement (https://www.springermedizin.de/resource/supplementary/12967_2003_19_MOESM2_ESM.pdf/9575582)

**\$4 billion** Annual 6<sup>th</sup> FP budget (2002-6)

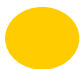

**\$27 billion** Annual NIH budget (2003)

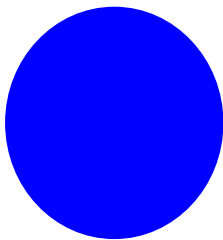

**\$155 billion** Annual revenue of 9 top US pharmaceutical companies (2000)

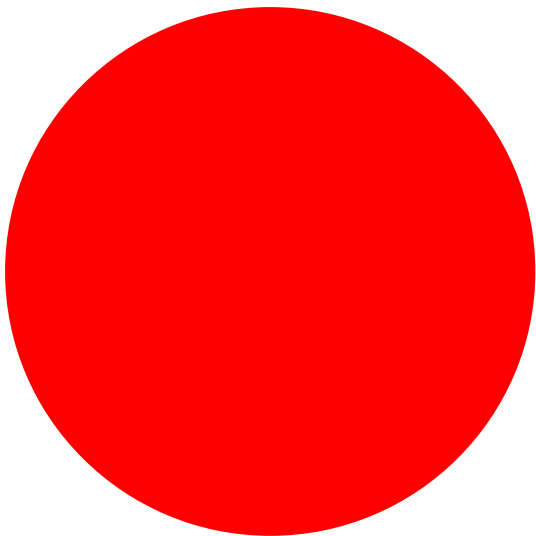

Supplement: MOESM2 [file 9575582]
